1  
2  
3  
4  
5  
6  
7  
8  
9  
10  
11  
12  
13  
14  
15  
16  
17  
18  
19  
20  
21  
22  
23  
24  
25  
26  
27  
28  
29  
30  
31

A novel virulence phenotype rapidly assesses *Candida* fungal pathogenesis in healthy and immunocompromised *Caenorhabditis elegans* hosts

Dorian J. Feistel, Rema Elmostafa, Nancy Nguyen, McKenna Penley, Levi Morran, and Meleah A. Hickman\*

Running title: Fungal infection reduces multiple measures of host fitness

Department of Biology, Emory University

\*corresponding author

## 32 **Abstract**

33 The yeast *Candida albicans* is an opportunistic pathogen of humans, meaning that  
34 despite commensal interactions with its host, it can transition to a harmful pathogen.  
35 While *C. albicans* is the predominant species isolated in the human mycobiome and  
36 implicated in fungal infection, infections due to non-*albicans Candida* species are rapidly  
37 rising. Studying the factors that contribute to virulence is often challenging and  
38 frequently depends on many contexts including host immune status and pathogen  
39 genetic background. Here, we utilize the nematode *Caenorhabditis elegans* as a  
40 perspicuous and efficient model host system to study fungal infections of *Candida*  
41 pathogens. We find that in addition to reducing lifetime host survival, exposure to *C.*  
42 *albicans* results in delayed reproduction, which significantly reduced lineage growth  
43 over multiple generations. Furthermore, we assessed fungal pathogen virulence in *C.*  
44 *elegans* hosts compromised for innate immune function and detected increased early  
45 mortality, reduced brood sizes and delayed reproduction relative to infected healthy  
46 hosts. Importantly, by assessing virulence in both healthy and immunocompromised  
47 host backgrounds we reveal the pathogen potential in non-*albicans Candida* species.  
48 We find that *C. tropicalis* is moderately virulent in both host backgrounds whereas *C.*  
49 *dublineinsis* and *C. parapsilosis* show little to no virulence in healthy hosts but  
50 significantly elevated virulence in immunocompromised hosts. Taken together, we  
51 present a novel lineage growth assay to measure reduction in host fitness associated  
52 with fungal infection and demonstrate significant interactions between pathogen and  
53 host immune function that contribute to virulence.

54

## 55 **Introduction**

56 *Candida* species are commensals of the human gastrointestinal microbiota and  
57 various other niches in the human body [1]. Despite their commensal existence in many  
58 humans, *Candida* species also account for the most fungal infections in the world and  
59 are the fourth most prevalent cause of all nosocomial blood stream infections [2,3]. The  
60 severity of fungal infection is often dependent on the immune status of the host, with  
61 superficial infections occurring in healthy individuals and bloodstream infections in  
62 immunocompromised hosts [4-8]. The majority of these infections are associated with

63 *Candida albicans*, however other non-*albicans Candida* species are increasingly  
64 becoming implicated in fungal infections [9,10].

65 Several host models have been employed to better understand fungal infection  
66 and disease progression. These experimental systems include mouse, zebrafish,  
67 nematode, wax moth and human *ex vivo* models have been specifically developed to  
68 study *Candida* infections [11]. Most often, virulence phenotypes are limited to survival  
69 outcomes or tissue-specific fungal burden [12], the latter of which requires animal  
70 sacrifice and cannot address the long-term consequence of fungal disease.  
71 Furthermore, animal mortality and sacrifice, particularly in vertebrate models, constrain  
72 the number of infected individuals to study and thus reduce the quantitative robustness  
73 of these experiments. Nonetheless, these studies provide valuable insight into *Candida*  
74 infection and disease and have uncovered important roles for innate immune function of  
75 hosts [13-15], specific *C. albicans* genes regulating virulence [16,17] and differences  
76 between genetic backgrounds within and between *Candida* species [18].

77 Other major limitations for most studies of *Candida* infection virulence include the  
78 time-intensive nature of tracking virulence phenotypes in vertebrate systems such as  
79 mice, the genetic intractability of zebrafish and wax moth larvae and the context-  
80 independent nature of *ex vivo* models [4]. As such, most studies focus specifically on *C.*  
81 *albicans* virulence while many non-*albicans Candida* species are evaluated to a lesser  
82 degree. The nematode *Caenorhabditis elegans* has been developed as a model for  
83 *Candida* infection to overcome these limitations [19,20] and to screen compounds for  
84 antifungal activity [21]. *C. elegans* has proven useful for studying host-microbe  
85 interactions [22] because many fungal and bacterial pathogens that cause illness in  
86 humans also cause disease in *C. elegans* [23]. Infecting *C. elegans* is relatively simple  
87 and often done by replacing or incorporating its standard laboratory food *E. coli* with a  
88 desired pathogen which colonizes the gut and causes disease [23]. Furthermore, the  
89 innate immune system in *C. elegans* includes the *SEK-1* gene which encodes a MAP  
90 Kinase Kinase (MAPKK) that is homologous to the MKK3/6 and MKK4 family of  
91 mammalian MAPKKs and activates the *C. elegans* p38 MAP kinase ortholog [24]. This  
92 pathway has been suggested to be an ancient and conserved component of *C. elegans*'  
93 immune response to pathogens [25]. As such, the *sek-1* mutation increases

94 susceptibility to microbial colonization [26], including infection with many *Candida*  
95 species [27] and is necessary to induce the appropriate antifungal immune defense [28].

96 In addition to utilizing innate immune system mutants, most studies measure host  
97 mortality in temperature sensitive sterile mutants [17,21,29,30] to more easily track  
98 mortality in founder populations since *C. elegans* has a rapid lifecycle and large brood  
99 sizes [31,32]. The effects on host reproduction are often overlooked in favor of  
100 examination of mortality rates when assessing a pathogen's virulence [33]. Yet, it is  
101 important to remember that virulence can be broadly measured as any reduction in host  
102 fitness resulting from interactions between a pathogen and its host [34-36]. In this work,  
103 we assessed virulence of *Candida* species in *C. elegans* hosts using a novel measure  
104 of host fitness that incorporated both host survival and fecundity. We found that fungal  
105 pathogens reduced host fitness by delaying reproduction, resulting in long-term  
106 consequences for population growth in both healthy and immunocompromised host  
107 backgrounds. Using this novel measure, we characterized virulence phenotypes for  
108 three non-*albicans* *Candida* species; *C. dubliniensis*, *C. tropicalis*, and *C. parapsilosis* in  
109 both healthy and immunocompromised *C. elegans* hosts. Our studies demonstrate that  
110 differences in virulence can be identified between pathogen species and that  
111 pathogenic potential is often revealed when host immune function is diminished.

112

## 113 **Methods**

### 114 *Strains and media*

115 For this study, the fungal pathogens *C. albicans* (SC5314 [37]), *C. dubliniensis*  
116 (Wu284 [38]), *C. tropicalis* (ATCC 22109), and *C. parapsilosis* (ATCC 22109) strains  
117 were used. *C. elegans* N2 Bristol (WT) and a *sek-1* mutant derivative [24] were used to  
118 test host survival, fecundity and population growth. *C. elegans* populations were  
119 maintained at 20°C on 100mm petri dishes with 25 mL of lite nematode growth medium  
120 (NGM, US Biological) with *E. coli* OP50 as a food source. Nematodes were transferred  
121 to a newly seeded *E. coli* plate every 3-4 days. For survival, fecundity and population  
122 growth assays, NGM was supplemented with 0.08g/L uridine, 0.08g/L histidine, and  
123 0.04g/L adenine to facilitate growth of auxotrophic *C. albicans* strains and 0.2g/L  
124 streptomycin sulfate to inhibit *E. coli* overgrowth so fungal strains could proliferate.

125

126 *Seeding NGM plates for survival, fecundity, and population growth assays*

127 *Candida* strains and *E. coli* OP50 strains were inoculated in 3 mL of YPD or 5 mL  
128 of LB, respectively, and cultured at 30°C for 1-2 days. *Candida* culture densities were  
129 measured with a spectrophotometer and diluted to a final volume of 3.0 OD<sub>600</sub> per mL  
130 (~6 x 10<sup>7</sup> cells per ml). *E. coli* cultures were pelleted and washed twice with 1 mL of  
131 ddH<sub>2</sub>O. The supernatant was removed and the pellet was centrifuged for 60 sec at  
132 maximum to remove any excess liquid. The pellet was weighed and suspended with  
133 sterilized water to a final volume of 200 mg/mL. A mix of 6.25 μL *E. coli*, 1.25 μL  
134 *Candida* was brought to a final volume of 50 μL with ddH<sub>2</sub>O. The entire 50 μL was  
135 spotted onto the center of a 35mm supplemented-NGM Lite agar plate and incubated at  
136 room temperature overnight before addition of eggs or transferring nematode. *E. coli*  
137 OP50 was used as a control at the same concentration described above.

138

139 *Egg preparation and synchronization for survival, fecundity and population growth*  
140 *assays*

141 For survival, fecundity and population growth assays, approximately 100  
142 nematodes at the L3/L4 stage were transferred to a 100mm NGM plate seeded with *E.*  
143 *coli* OP50 and maintained at 20°C for 2-3 days prior to the start of an experiment. On  
144 the first day of an experiment, these NGM plates were washed with M9 buffer and  
145 contents (live nematodes and eggs) transferred to 15 mL conical tube and pelleted by  
146 centrifugation (2 min at 1200 rpm). The pellet was re-suspended in a 1:4 bleach (5.25%)  
147 solution and transferred to a micro-centrifuge tube. The suspension was mixed via  
148 inversion for 90-120 sec and subsequently centrifuged (30 sec at 1500 rpm). The pellet  
149 was washed with 1 mL M9 buffer three consecutive times to remove excess bleach  
150 solution and brought to a final suspension with 500 μL M9 buffer. To determine the  
151 concentration of eggs, 10 μL was placed on a concaved slide and eggs counted and the  
152 egg suspension was diluted with M9 to a final concentration of 10 eggs/μL. All assays  
153 were treated equally on the first day (Day 0) by adding roughly 100 eggs to a treatment  
154 or *E. coli* plate (described above).

155

156 *Survival assays*

157 This experimental procedure is a modified version of [39]. Briefly, 72h (Day 3)  
158 after adding ~50-75 nematode eggs to a plate, 40 adult nematodes were randomly  
159 selected and transferred to newly seeded plates with the same concentration of food as  
160 described above and incubated at 20°C. Every other day nematodes were transferred to  
161 freshly seeded plates until all nematode populations went extinct. The number of living,  
162 dead, and censored worms were scored daily. Each survival assay was replicated at  
163 least three independent times.

164

165 *Fecundity and lineage expansion assays*

166 For both fecundity and lineage expansion assays, 48h (Day 2) after adding  
167 nematode eggs to a plate, a single L3/L4 reproductively immature hermaphroditic  
168 nematode was randomly selected and transferred (6-10 independent biological  
169 replicates per treatment per block) to a newly seeded 35mm petri plate containing either  
170 a treatment of *C. albicans* and *E. coli* or *E. coli* alone (described above) containing one-  
171 fifth the volume of food and incubated at 20°C. *C. elegans* were transferred to freshly  
172 seeded plates in 24 hour time intervals from day two until the end of the experiment.  
173 Eggs remained undisturbed on the plate and were incubated at 20°C for an additional  
174 24 h to provide enough time to hatch, at which the number of viable progeny per day  
175 was scored. Nematodes that died during the assay were scored dead at the time of  
176 transfer. Nematodes that crawled off the plate or were otherwise unaccountable for  
177 were considered censored and excluded from the analysis.

178

179 *Lineage Expansion Assay*

180 48 hours after adding nematode eggs to a plate (Day 2), a single L3/L4  
181 reproductively immature hermaphroditic nematode was randomly selected and  
182 transferred (6 biological replicates per treatment) to a freshly seeded 100mm treatment  
183 or *E. coli* plate (described above) containing a 6-fold increase in food. On Day 7, each  
184 plate was washed with M9 buffer until the majority of nematodes were displaced and  
185 subsequently transferred to 15mL conical tubes. Tubes were placed at 4°C for 1h to

186 allow the nematodes to settle at the bottom. All tubes were concentrated to a final  
187 volume of 10mL. Six-20uL samples were taken from each population and counted.

188

## 189 Results

### 190 *Exposure to C. albicans reduces multiple measures of C. elegans fitness*

191 Pathogens affect host fitness by decreasing lifespan and/or reducing fecundity.

192 To determine how *C. albicans* impacts *C. elegans* host fitness, we first measured  
193 nematode lifespan in the presence or absence of *C. albicans*. We observed a significant  
194 reduction in survival when *C. elegans* was reared on *C. albicans* compared to when it  
195 was reared in its absence (Figure 1,  $p < 0.0001$  Log-rank test), consistent with  
196 previously published results [39]. 50% mortality was reached in eight days in nematode  
197 populations exposed to *C. albicans* compared to 16 days in unexposed nematode  
198 populations, indicating that *C. elegans* lifespan is substantially decreased by exposure  
199 to *C. albicans*.

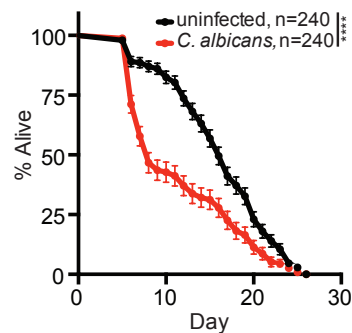

**Figure 1: Reduced nematode survival with *C. albicans* infection.** Survival curves for *C. elegans* populations that are either uninfected (exposed to just an *E. coli* food source, black) or when infected with *C. albicans* SC5314 (red). Mean data values are plotted with SEM error bars, number of worms analyzed (n) for each treatment is indicated in the legend. \*\*\*\* indicates  $p < 0.0001$ , Log-rank (Mantel-Cox) test.

200

201 While overall survival was reduced, nematode death was rarely observed earlier  
202 than 5 days post-infection. Importantly, adult nematodes produce the majority of their  
203 offspring before *C. albicans* infection reduces rates of survival. Given this information  
204 and that fecundity is a key component of fitness from an evolutionary perspective, we  
205 investigated whether *C. albicans* negatively impacts *C. elegans* reproduction. To test  
206 this, we counted the total number of viable progeny (i.e. brood size) produced in the first  
207 seven days of reproductive maturity from individual nematodes that were either

208 unexposed or exposed to either heat-killed or live *C. albicans*. As shown in Figure 2A,  
 209 exposure to *C. albicans* reduced the average number of viable progeny ( $267 \pm 6$ )  
 210 compared to the unexposed control ( $286 \pm 4$ ;  $p < 0.05$ , one-way ANOVA) by  $\sim 7\%$ . While  
 211 statistically significant, the cost of *C. albicans* toward host brood size is modest.  
 212 Furthermore, the brood size of nematodes exposed to heat-killed *C. albicans* (HK) was  
 213 not detectably different from uninfected or live *C. albicans* treatments (Figure 2A).

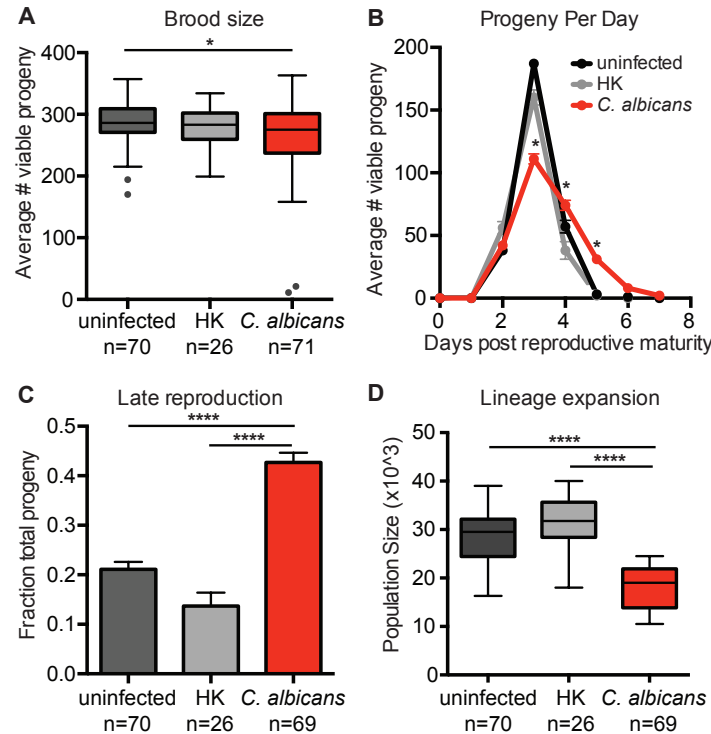

**Figure 2. Live *C. albicans* reduces nematode fecundity.** **A)** Box and whiskers plot of average brood sizes for *C. elegans* (N2) exposure to *E. coli* food source alone (uninfected, black), heat-killed *C. albicans* (HK, grey), or live *C. albicans* (red). Boxes indicate the 25-75th quartiles with median indicated. Error bars are the normalized range of the data and circles indicate outliers. **B)** Number of viable *C. elegans* progeny produced per day in uninfected, heat-killed and live *C. albicans* treatments. Data represent the mean and error bars indicate SEM. **C)** The fraction of *C. elegans* progeny produced after Day 3 during the 'Late Reproductive' window. Data represent the mean and error bars indicate SEM. **D)** Box and whiskers plot of average population size (representing the number of F1 and F2 progeny) produced from a single founder *C. elegans*. Boxes indicate the 25-75th quartiles with median indicated. Error bars are the normalized range of the data and circles indicate outliers. The number (n) of experimental samples analyzed is indicated for each treatment. \*  $p < 0.05$ , \*\*\*\*  $p < 0.0001$ ; one-way ANOVA with Tukey's multiple comparison test.

214  
 215 Intriguingly, we identified a significant delay in reproductive timing when we  
 216 measured the number of progeny produced every 24 hrs during the host reproductive  
 217 window. We observed a large reduction in reproduction on Day 3 in nematodes  
 218 exposed to *C. albicans* ( $102 \pm 4$ ) relative to unexposed hosts ( $174 \pm 4$ ) (Figure 2B;  $p <$   
 219  $0.001$  two-tailed t-test) and increased progeny produced on Days 4-6 in nematodes



220 exposed to *C. albicans* (Figure 2B). We calculated the total fraction of reproduction  
221 occurring in this 'late' window (Days 4-6) and identified a significant increase in the  
222 progeny produced late in *C. elegans* exposed to *C. albicans* compared to unexposed  
223 controls (Figure 2C;  $p=0.0205$  two-tailed t-test). Taken together, our data indicate that  
224 *C. albicans* severely delays and reduces reproduction, in addition to impacting overall  
225 survival in *C. elegans*.

226 To investigate whether the reproductive delay observed in nematodes exposed  
227 to *C. albicans* had any long-term consequences, we measured the total progeny  
228 produced from a single founder worm over multiple generations through lineage  
229 expansion assays. From these experiments, we find that a single nematode can  
230 produce ~28,500 F1 and F2 progeny within seven days (Figure 2D). Lineage expansion  
231 is significantly impacted in nematodes exposed to live *C. albicans*, with an average  
232 population size of ~18,000 F1 and F2 progeny, a reduction of ~35% compared to  
233 uninfected and heat-killed control treatments (Figure 2D,  $p < 0.0001$  one-way ANOVA).  
234 We conclude that delays in reproduction resulting from exposure to *C. albicans* severely  
235 impacts *C. elegans* evolutionary fitness, as we detect a dramatic reduction in population  
236 size in a timeframe that is unlikely to be severely impacted by mortality (Figure 1) nor  
237 the modest reduction in total brood size (Figure 2A).

238

### 239 *Immunocompromised hosts are susceptible to fungal infection*

240 *C. albicans* is an opportunistic pathogen meaning that it only causes disease  
241 under certain conditions and host contexts. A leading host-related risk factor for invasive  
242 candidiasis is compromised immune function [40]. Given our novel results regarding  
243 fecundity in a healthy *C. elegans* host, we were curious how exposure to *C. albicans*  
244 impacts *C. elegans* hosts with compromised immune function. To address this point, we  
245 utilized a *C. elegans* strain background carrying a mutation in *SEK-1*, a well-conserved  
246 MAP kinase involved in the innate immune signaling cascade [24,26] and antifungal  
247 response [28]. We detected substantial mortality in *sek-1* immunocompromised hosts  
248 during the course of our seven-day fecundity assays, which we did not observe with  
249 healthy wild-type hosts (data not shown). Furthermore, exposure to *C. albicans* resulted  
250 in the largest amount of early mortality in immunocompromised hosts compared to heat-

251 killed *C. albicans* treatments and unexposed controls (Figure 3A). In addition to  
 252 increased early mortality, *C. albicans* exposure reduced average brood size by nearly  
 253 50% ( $84 \pm 6$ ) in immunocompromised hosts compared to uninfected ( $157 \pm 5$ ) and heat-  
 254 killed ( $127 \pm 13$ ) controls (Figure 3B,  $p < 0.0001$ , one-way ANOVA). It is important to note  
 255 that in all treatments (unexposed, heat-killed, and live *C. albicans*),  
 256 immunocompromised hosts produced significantly less progeny than healthy hosts  
 257 (Table S1), but even more so when exposed to live *C. albicans*.

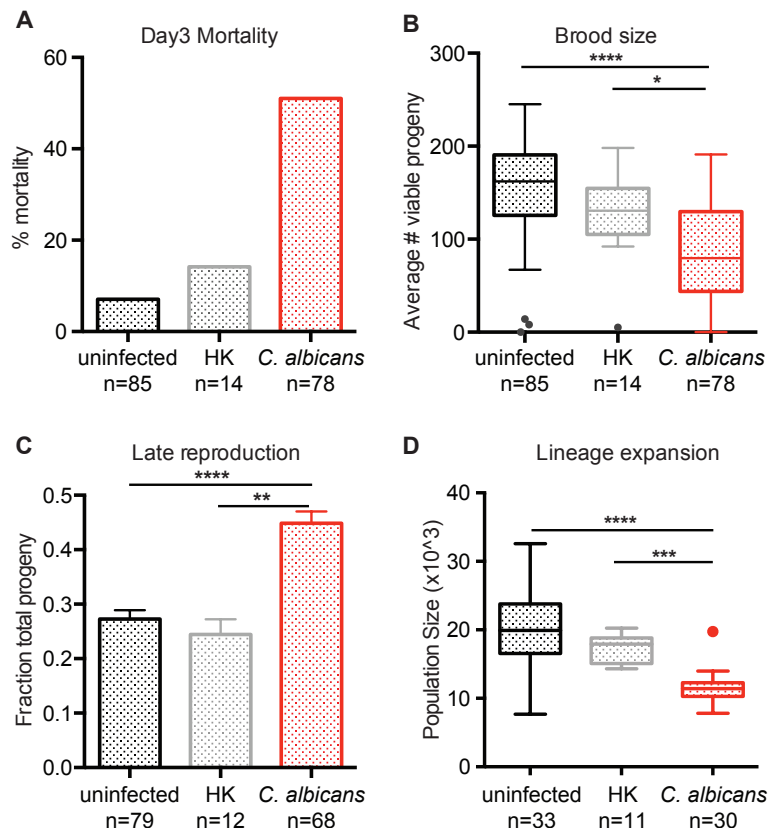

**Figure 3. Live *C. albicans* severely impacts host fitness in immunocompromised nematodes.** **A)** Percent mortality observed on or by Day3 in immunocompromised (*sek-1*) hosts exposed to *E. coli* food source alone (uninfected, black), heat-killed *C. albicans* (HK, grey), or live *C. albicans* (red). **B)** Box and whiskers plot of average brood sizes of *sek-1 C. elegans* treated with the same conditions as (A). Boxes indicate the 25-75th quartiles with median indicated. Error bars are the normalized range of the data and circles indicate outliers. **C)** The fraction of *sek-1 C. elegans* progeny produced after Day3 in the 'Late Reproductive' window. Data represent the mean and error bars indicate SEM. **D)** Box and whiskers plot of average population size (representing the number of F1 and F2 progeny) produced from a single founder *sek-1 C. elegans*. Boxes indicate the 25-75th quartiles with median indicated. Error bars are the normalized range of the data and circles indicate outliers. The number (n) of experimental samples analyzed is indicated for each treatment. \*  $p < 0.05$ , \*\*  $p < 0.01$ , \*\*\*  $p < 0.001$ , \*\*\*\*  $p < 0.0001$ ; one-way ANOVA with Tukey's multiple comparison test.

258

259 One explanation for the overall reduction in average brood size is the increased

260 early mortality we observe in immunocompromised hosts. To address this possibility,

261 we re- analyzed brood size only from hosts that survived past Day3 and found that while  
262 this did slightly increase average brood size across all treatments, it was not significant  
263 between analyses ( $p=0.2356$  two-tailed t-test) and exposure to *C. albicans* still  
264 significantly reduced average brood size ( $94\pm6$ ) relative to uninfected ( $163\pm5$ ) and heat-  
265 killed controls ( $141\pm9$ ) (Figure S1,  $p < 0.0001$  one-way ANOVA). For hosts that survived  
266 past three days, we also detected a significant delay in reproductive timing upon  
267 exposure to *C. albicans*, with nearly 45% of all reproduction occurring in this late  
268 window (Figure 3C), similar to what we observe in healthy hosts (Table S1).

269 We predicted that lineage expansion in immunocompromised hosts exposed to  
270 *C. albicans* would be more dramatically impacted relative to wild-type nematodes  
271 exposed to *C. albicans*, given the reproductive delays but also early mortality, and  
272 overall reduced brood sizes observed. Indeed, we determined that the average  
273 population size was reduced by ~45% in immunocompromised hosts exposed to *C.*  
274 *albicans* compared to uninfected or heat-killed controls (Figure 3D). Furthermore, this  
275 reduction in population size is significantly greater in immunocompromised hosts  
276 compared to healthy hosts (Figure S2,  $p = 0.035$  two-tailed t-test). Interestingly, we also  
277 detected a significant reduction in population size in immunocompromised hosts  
278 exposed to heat-killed *C. albicans* relative to uninfected immunocompromised hosts.  
279 This reduction in population size in heat-killed treatments may result from the increased  
280 early mortality in immunocompromised nematodes. Taken together, our results indicate  
281 that immunocompromised hosts are more susceptible to fungal infection than healthy  
282 wild-type hosts.

283

#### 284 *Host immune status reveals pathogenic potential in other Candida species*

285 While *C. albicans* is the predominant fungal agent in invasive candidiasis, non-  
286 *albicans Candida* species (NACs) are estimated to account for 35-65% of  
287 candidaemia [41]. Here, we measured the impact on host fitness of three additional  
288 *Candida* species: *C. dubliniensis*, *C. tropicalis* and *C. parapsilosis* analyzing both  
289 healthy and immunocompromised *C. elegans* hosts. By evaluating NACs in both healthy  
290 and immunocompromised hosts, we can begin to assess their pathogenic potential, and  
291 thus extend the utility of *C. elegans* as a model host system for detecting virulence in

292 *Candida* species. For healthy hosts infected with *C. dubliniensis* and *C. tropicalis*, we  
293 detected modest levels of early mortality, and we detected no early mortality in healthy  
294 hosts infected with *C. parapsilosis*. However, there was increased early mortality in  
295 immunocompromised hosts exposed to all three *Candida* species, with the highest  
296 mortality observed for *C. parapsilosis* (Figure 4A). In regards to early mortality, we  
297 determined that *C. parapsilosis* has high virulence in immunocompromised hosts, but  
298 none in healthy hosts.

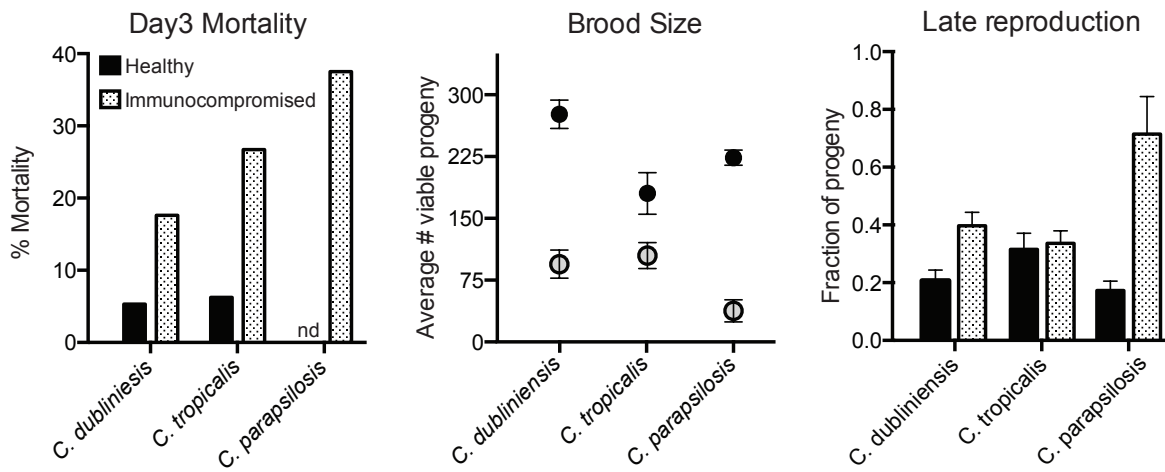

**Figure 4. Non-*albicans* *Candida* species differentially impact host fitness depending on host immune status. A)** Percent mortality observed on or by Day3 in N2 (healthy, black) or *sek-1* ('immunocompromised,' grey) *C. elegans* hosts exposed to *C. dubliniensis*, *C. tropicalis* and *C. parapsilosis*. **B)** Average brood sizes of N2 and *sek-1* *C. elegans* hosts exposed to *C. dubliniensis*, *C. tropicalis* and *C. parapsilosis*. Data represent the mean and error bars indicate SEM. **C)** The fraction of N2 and *sek-1* *C. elegans* progeny produced after Day 3 in the 'Late Reproductive' window when exposed to *C. dubliniensis*, *C. tropicalis* and *C. parapsilosis*. Data represent the mean and error bars indicate SEM. Refer to Table S1 for experimental sample sizes (n). \* p < 0.05, \*\* p < 0.01, \*\*\* p < 0.001, \*\*\*\* p < 0.0001; one-way ANOVA with Tukey's multiple comparison test.

299

300 We also detected different pathogen virulence levels depending on host immune  
301 function for average brood size (Figure 4B) and reproductive delays (Figure 4C). In  
302 healthy hosts, *C. dubliniensis* had no significant impact on average brood size (276±17)  
303 or reproductive timing (21% late) compared to uninfected controls (286±5 brood size  
304 and 21% late). However, *C. dubliniensis* was much more virulent in  
305 immunocompromised hosts, where we observed a 40% reduction in total brood size  
306 (94±17, Figure 4B) and increased reproductive delays compared to uninfected hosts  
307 (Figure 4C). A similar pattern is observed for *C. parapsilosis*, in which healthy hosts  
308 were not significantly impacted in regards to reproductive timing (17% late, Figure 4B)  
309 and only modest reductions in average brood size (224±9) were observed compared to

310 uninfected healthy hosts. However, *C. parapsilosis* infection greatly reduced average  
311 brood size ( $38\pm 13$ ) and delayed reproductive timing (72% late) in immunocompromised  
312 hosts.

313 Not all *Candida* species exhibited elevated virulence in immunocompromised  
314 hosts. For example, *C. tropicalis* reduced average brood size by about 37% in healthy  
315 hosts ( $180\pm 25$ ) and 34% in immunocompromised hosts ( $105\pm 16$ ) (Figure 4B) compared  
316 to uninfected treatments. Furthermore, we saw similar significant increases in  
317 reproductive delays in healthy (32% late) and immunocompromised (34%) hosts (Figure  
318 4C). If we compare these three *Candida* species to each other, we see significant  
319 differences for both average brood size (Figure 4B,  $p=0.0012$  and  $p=0.015$  comparing  
320 healthy and immunocompromised hosts, respectively, one-way ANOVA) and  
321 reproductive timing in immunocompromised hosts (Figure 4C,  $p = 0.0029$  one-way  
322 ANOVA), but not in healthy hosts ( $p = 0.0573$  one-way ANOVA). In healthy hosts, *C.*  
323 *tropicalis* significantly reduced average brood size more than *C. dubliniensis*, but in  
324 immunocompromised hosts, no significant difference is detected. In  
325 immunocompromised hosts, *C. parapsilosis* displayed significantly more virulence in  
326 regards to both average brood size and reproductive timing compared to *C. tropicalis*  
327 and *C. dubliniensis*. Given the virulence phenotypes of these yeasts, our results  
328 suggest that fungal pathogenicity depends not only on the species of pathogen but also  
329 on the immune status of the host.

330

## 331 Discussion

332 Here we utilized a *C. elegans* experimental host system to identify novel  
333 measures of host fitness associated with fungal infection. By tracking the number of  
334 progeny produced per day, we can quickly and quantitatively assess three aspects of  
335 host fitness: early mortality, total viable offspring produced and reproductive timing. We  
336 show that exposure to *Candia albicans* in healthy *C. elegans* hosts not only reduces  
337 survival (Figure 1), it modestly reduces total progeny produced, and dramatically delays  
338 reproductive timing (Figure 2). This reproductive delay has long-term consequences for  
339 lineage expansion, as single founder nematodes exposed to *C. albicans* reduces its  
340 population growth by ~30% (Figure 2D). We found similar delays in reproductive timing

341 in immunocompromised hosts exposed to *C. albicans*, although immunocompromised  
342 hosts are more susceptible to infection and have higher incidence of early mortality and  
343 smaller brood sizes compared to healthy hosts (Figure 3). Importantly, the delayed  
344 reproduction phenotype in infected *C. elegans* is easily ascertained, highly quantitative  
345 and reproducible and can be used as a screening method to detect relatively small  
346 differences in virulence across *Candida* strains or other fungal species. Furthermore, by  
347 utilizing different host contexts, this assay revealed the pathogenic potential of other  
348 important, yet understudied, *Candida* species (Figure 4), including *C. parapsilosis*,  
349 which has dramatically higher levels of virulence in immunocompromised hosts  
350 compared to healthy hosts.

351         The reductions in host fitness associated with *C. albicans* and other *Candida*  
352 species indicate that we have established a bona fide model of fungal infection.  
353 Importantly, these reductions in host fitness cannot be attributed to *Candida* species  
354 being a sub-optimal food source or that the hosts are starving because we deliver the  
355 pathogen with *E. coli*, the standard food source for *C. elegans*. Further, we do not  
356 detect any host larval development into dauer, an alternative lifestage in response to  
357 starvation and overpopulation [32]. While pathogen avoidance is a common defense  
358 strategy for *C. elegans* [42], we censored any worms that have crawled off the plate or  
359 have disappeared during the course of our experiment and removed them from our data  
360 analysis. Furthermore, the reductions in host fitness depend on ingesting live *C.*  
361 *albicans*, as heat-killed treatments do not cause significant reductions in total brood  
362 size, reproductive timing, or lineage expansion (Figure 2, 'HK'). Microscopic analysis  
363 reveals that fungal cells inhabit the gut of *C. elegans* ([39] and data not shown) and we  
364 can extract viable host-associated fungal cells (data not shown). Taken together, these  
365 data support a model of fungal infection in the host *C. elegans*.

366         The host reproductive delay we observed in *C. elegans* upon fungal infection is a  
367 robust, highly quantitative measure of virulence that makes it amenable to screen a  
368 variety of host and pathogen genetic backgrounds that has been challenging in  
369 mammalian and insect models. *C. elegans* is easily maintained in the lab, has a short  
370 lifecycle that generates a large number of progeny, and has been a fundamental model  
371 genetic organism [32]. Previous work has shown that upon exposure to *C. albicans*, *C.*

372 *elegans* have a transcriptional response consistent with that of infection [28]. In this  
373 work, we utilized a mutant *C. elegans* strain in which *SEK-1*, an important MAPK in  
374 innate immunity and whose homologs include the MKK3/6 and MKK4 family of  
375 mammalian MAPKs, to determine the severity of fungal infection in  
376 immunocompromised hosts. We demonstrate that deficiencies in innate immune  
377 function result in hosts with high susceptibility to fungal infection and in the future can  
378 extend this analysis for many other host backgrounds that are mutant for immune  
379 function.

380 Previous studies using *C. elegans* as a host for fungal infection have described  
381 additional phenotypes beyond reduced survival, including a deformed anal region (DAR)  
382 [39,43]. It is possible that DAR may be contributing to the delayed reproductive  
383 phenotype we observe in our experiments, however, the frequency of DAR phenotypes  
384 was low and we did not observe any detectable differences between hosts exposed to  
385 *C. albicans* and hosts unexposed (data not shown), nor did we observe dramatic  
386 reductions in total number of viable offspring produced between these two groups of  
387 hosts (Figure 2A), indicating that exhibiting a DAR phenotype does not necessarily  
388 impede egg laying. While this deformity is a result of a local defense reaction of the  
389 worm due to extracellular signal-regulated kinase activation of the innate immunity  
390 MAKK cascade, it is a distinct marker from delayed reproduction for infection [44].  
391 Wildtype reproductive timing utilizes the highly conserved DAF-2 DAF-16 insulin-like  
392 signaling pathway [23], but has also been implicated in innate immunity and bacterial  
393 infection [45] and is potentially disrupted in *C. elegans* hosts infected with *Candida*.

394 Impacts on host reproduction have often been overlooked in studies regarding  
395 *Candida* virulence, yet host reproduction is an important evolutionary measure of an  
396 organism's fitness. Not only can we utilize these fecundity assays to assess the roles of  
397 host immune function on fungal pathogenesis, we also readily screen diverse pathogen  
398 strain backgrounds and species. A large-scale, international 10-year study identified 31  
399 species of *Candida* associated with clinical samples. While *C. albicans* is still the most  
400 prevalent, its isolation from clinical isolates is decreasing with corresponding increases  
401 isolation of *C. glabrata*, *C. tropicalis* and *C. parapsilosis* [46]. Despite its close  
402 evolutionary relationship with *C. albicans*, *C. dubliniensis* does not seem to be highly

403 pathogenic [47]. However, other non-*albicans Candida* species have been increasingly  
404 implicated in fungal infections of humans [48]. For example, *C. tropicalis* and *C.*  
405 *parapsilosis* are common fungal species isolated in patients with candidemia (7 - 48%  
406 and 11 - 27% respectively and depending on geographic region), candiduria (8 – 44%  
407 and 0.5 – 11% respectively, and oral candidosis (5 – 13% and 7 – 15%, respectively)  
408 ([48] and references therein). Despite the increasing incidence of non-*albicans Candida*  
409 infections [46], experimental studies using these pathogens remains limited. Here, we  
410 analyzed the virulence phenotypes of three non-*albicans Candida* species, *C.*  
411 *dublinsiensis*, *C. tropicalis* and *C. parapsilosis* in both healthy and immunocompromised  
412 host backgrounds. In healthy *C. elegans* hosts, *C. dublinsiensis* is the least virulent; with  
413 no significant differences in brood size or reproductive timing compared to uninfected  
414 hosts. *C. parapsilosis* is moderately virulent in healthy hosts; there is no reproductive  
415 delay, but reduced brood sizes are detected. For both *C. dublinsiensis* and *C. tropicalis*,  
416 virulence is more severe in immunocompromised hosts. In contrast, *C. tropicalis* has  
417 similar degrees of virulence between healthy and immunocompromised host  
418 backgrounds. Together, our results regarding virulence in NACs are consistent with  
419 published case reports where there is higher incidence of isolating *C. tropicalis* in fungal  
420 infections affecting patients with healthy immune function (oral candidosis and  
421 candiduria) and infections affecting patients with compromised immune function  
422 (candidemia), whereas we see significant *C. parapsilosis* virulence only in  
423 immunocompromised hosts. Therefore, the *C. elegans* fecundity assays we developed  
424 in this study can reveal the pathogenic potential by assessing virulence in multiple host  
425 genetic backgrounds and across pathogens.

426

## 427 Literature Cited

428

- 429 1. Underhill, D. M.; Iliiev, I. D. The mycobiota: interactions between commensal fungi  
430 and the host immune system. *Nature reviews. Immunology* **2014**, *14*, 405–416.
- 431 2. Pappas, P. G.; Lionakis, M. S.; Arendrup, M. C.; Ostrosky-Zeichner, L.; Kullberg, B. J.  
432 Invasive candidiasis. *Nat Rev Dis Primers* **2018**, *4*, 18026.



- 433 3. Edmond, M. B.; Wallace, S. E.; McClish, D. K.; Pfaller, M. A.; Jones, R. N.; Wenzel,  
434 R. P. Nosocomial bloodstream infections in United States hospitals: a three-year  
435 analysis. *Clin Infect Dis* **1999**, *29*, 239–244.
- 436 4. MacCallum, D. M. Hosting infection: experimental models to assay *Candida*  
437 virulence. *Int J Microbiol* **2012**, *2012*, 363764–12.
- 438 5. Pfaller, M. A. Nosocomial candidiasis: emerging species, reservoirs, and modes of  
439 transmission. *Clin Infect Dis* **1996**, *22 Suppl 2*, S89–94.
- 440 6. Coleman, D. C.; Sullivan, D. J.; Bennett, D. E.; Moran, G. P.; Barry, H. J.; Shanley, D.  
441 B. Candidiasis: the emergence of a novel species, *Candida dubliniensis*. *AIDS* **1997**,  
442 *11*, 557–567.
- 443 7. Kontoyiannis, D. P.; Vaziri, I.; Hanna, H. A.; Boktour, M.; Thornby, J.; Hachem, R.;  
444 Bodey, G. P.; Raad, I. I. Risk Factors for *Candida tropicalis* fungemia in patients with  
445 cancer. *Clin Infect Dis* **2001**, *33*, 1676–1681.
- 446 8. Clark, T. A.; Slavinski, S. A.; Morgan, J.; Lott, T.; Arthington-Skaggs, B. A.; Brandt, M.  
447 E.; Webb, R. M.; Currier, M.; Flowers, R. H.; Fridkin, S. K.; Hajjeh, R. A.  
448 Epidemiologic and molecular characterization of an outbreak of *Candida parapsilosis*  
449 bloodstream infections in a community hospital. *J. Clin. Microbiol.* **2004**, *42*, 4468–  
450 4472.
- 451 9. Pfaller, M. A.; Diekema, D. J.; Jones, R. N.; Sader, H. S.; Fluit, A. C.; Hollis, R. J.;  
452 Messer, S. A.; SENTRY Participant Group International surveillance of bloodstream  
453 infections due to *Candida* species: frequency of occurrence and in vitro  
454 susceptibilities to fluconazole, ravuconazole, and voriconazole of isolates collected  
455 from 1997 through 1999 in the SENTRY antimicrobial surveillance program. *J. Clin.*  
456 *Microbiol.* **2001**, *39*, 3254–3259.
- 457 10. Hajjeh, R. A.; Sofair, A. N.; Harrison, L. H.; Lyon, G. M.; Arthington-Skaggs, B. A.;  
458 Mirza, S. A.; Phelan, M.; Morgan, J.; Lee-Yang, W.; Ciblak, M. A.; Benjamin, L. E.;  
459 Sanza, L. T.; Huie, S.; Yeo, S. F.; Brandt, M. E.; Warnock, D. W. Incidence of  
460 bloodstream infections due to *Candida* species and in vitro susceptibilities of isolates  
461 collected from 1998 to 2000 in a population-based active surveillance program. *J.*  
462 *Clin. Microbiol.* **2004**, *42*, 1519–1527.

- 463 11. Harwood, C. G.; Rao, R. P. Host pathogen relations: exploring animal models for  
464 fungal pathogens. *Pathogens* **2014**, *3*, 549–562.
- 465 12. Conti, H. R.; Huppler, A. R.; Whibley, N.; Gaffen, S. L. Animal models for  
466 candidiasis. *Curr Protoc Immunol* **2014**, *105*, 19.6.1–17.
- 467 13. Verma, A.; Gaffen, S. L.; Swidergall, M. Innate Immunity to Mucosal Candida  
468 Infections. *J Fungi (Basel)* **2017**, *3*, 60.
- 469 14. Naglik, J. R.; König, A.; Hube, B.; Gaffen, S. L. Candida albicans-epithelial  
470 interactions and induction of mucosal innate immunity. *Curr Opin Microbiol* **2017**, *40*,  
471 104–112.
- 472 15. Richardson, J. P.; Moyes, D. L.; Ho, J.; Naglik, J. R. Candida innate immunity at the  
473 mucosa. *Seminars in Cell & Developmental Biology* **2018**.
- 474 16. Lu, Y.; Su, C.; Solis, N. V.; Filler, S. G.; Liu, H. Synergistic regulation of hyphal  
475 elongation by hypoxia, CO<sub>2</sub>, and nutrient conditions controls the virulence of  
476 Candida albicans. *Cell Host Microbe* **2013**, *14*, 499–509.
- 477 17. Pukkila-Worley, R.; Peleg, A. Y.; Tampakakis, E.; Mylonakis, E. Candida albicans  
478 hyphal formation and virulence assessed using a Caenorhabditis elegans infection  
479 model. *Eukaryotic Cell* **2009**, *8*, 1750–1758.
- 480 18. Hirakawa, M. P.; Martinez, D. A.; Sakthikumar, S.; Anderson, M. Z.; Berlin, A.; Gujja,  
481 S.; Zeng, Q.; Zisson, E.; Wang, J. M.; Greenberg, J. M.; Berman, J.; Bennett, R. J.;  
482 Cuomo, C. A. Genetic and phenotypic intra-species variation in Candida albicans.  
483 *Genome Res* **2015**, *25*, 413–425.
- 484 19. Powell, J. R.; Ausubel, F. M. Models of Caenorhabditis elegans infection by  
485 bacterial and fungal pathogens. *Methods Mol Biol* **2008**, *415*, 403–427.
- 486 20. Aballay, A.; Ausubel, F. M. Caenorhabditis elegans as a host for the study of host-  
487 pathogen interactions. *Curr Opin Microbiol* **2002**, *5*, 97–101.
- 488 21. Breger, J.; Fuchs, B. B.; Aperis, G.; Moy, T. I.; Ausubel, F. M.; Mylonakis, E.  
489 Antifungal chemical compounds identified using a C. elegans pathogenicity assay.  
490 *PLoS Pathog* **2007**, *3*, e18.
- 491 22. Sifri, C. D.; Begun, J.; Ausubel, F. M. The worm has turned--microbial virulence  
492 modeled in Caenorhabditis elegans. *Trends Microbiol.* **2005**, *13*, 119–127.

- 493 23. Irazoqui, J. E.; Urbach, J. M.; Ausubel, F. M. Evolution of host innate defence:  
494 insights from *Caenorhabditis elegans* and primitive invertebrates. *Nature reviews.*  
495 *Immunology* **2010**, *10*, 47–58.
- 496 24. Kim, D. H.; Feinbaum, R.; Alloing, G.; Emerson, F. E.; Garsin, D. A.; Inoue, H.;  
497 Tanaka-Hino, M.; Hisamoto, N.; Matsumoto, K.; Tan, M.-W.; Ausubel, F. M. A  
498 conserved p38 MAP kinase pathway in *Caenorhabditis elegans* innate immunity.  
499 *Science* **2002**, *297*, 623–626.
- 500 25. Ermolaeva, M. A.; Schumacher, B. Insights from the worm: The *C. elegans* model  
501 for innate immunity. *Seminars in Immunology* **2014**, *26*, 303–309.
- 502 26. Youngman, M. J.; Rogers, Z. N.; Kim, D. H. A Decline in p38 MAPK Signaling  
503 Underlies Immunosenescence in *Caenorhabditis elegans*. *PLOS Genet* **2011**, *7*,  
504 e1002082.
- 505 27. Ortega-Riveros, M.; De-la-Pinta, I.; Marcos-Arias, C.; Ezpeleta, G.; Quindós, G.;  
506 Eraso, E. Usefulness of the Non-conventional *Caenorhabditis elegans* Model to  
507 Assess *Candida* Virulence. *Mycopathologia* **2017**, *182*, 785–795.
- 508 28. Pukkila-Worley, R.; Ausubel, F. M.; Mylonakis, E. *Candida albicans* Infection of  
509 *Caenorhabditis elegans* Induces Antifungal Immune Defenses. *PLoS Pathog* **2011**,  
510 *7*, e1002074–13.
- 511 29. Moy, T. I.; Ball, A. R.; Anklesaria, Z.; Casadei, G.; Lewis, K.; Ausubel, F. M.  
512 Identification of novel antimicrobials using a live-animal infection model. *Proc Natl*  
513 *Acad Sci USA* **2006**, *103*, 10414–10419.
- 514 30. Peleg, A. Y.; Tampakakis, E.; Fuchs, B. B.; Eliopoulos, G. M.; Moellering, R. C.;  
515 Mylonakis, E. Prokaryote-eukaryote interactions identified by using *Caenorhabditis*  
516 *elegans*. *Proc Natl Acad Sci U S A* **2008**, *105*, 14585–14590.
- 517 31. Muschiol, D.; Schroeder, F.; Traunspurger, W. Life cycle and population growth rate  
518 of *Caenorhabditis elegans* studied by a new method. *BMC Ecol.* **2009**, *9*, 14.
- 519 32. Corsi, A. K.; Wightman, B.; Chalfie, M. A Transparent Window into Biology: A Primer  
520 on *Caenorhabditis elegans*. *Genetics* **2015**, *200*, 387–407.
- 521 33. Abbate, J. L.; Kada, S.; Lion, S. Beyond Mortality: Sterility As a Neglected  
522 Component of Parasite Virulence. *PLoS Pathog* **2015**, *11*, e1005229.
- 523 34. Read, A. F. The evolution of virulence. *Trends Microbiol.* **1994**, *2*, 73–76.

- 524 35. Lipsitch, M.; Siller, S.; Nowak, M. A. THE EVOLUTION OF VIRULENCE IN  
525 PATHOGENS WITH VERTICAL AND HORIZONTAL TRANSMISSION. *Evolution*  
526 **1996**, *50*, 1729–1741.
- 527 36. Cressler, C. E.; McLEOD, D. V.; Rozins, C.; van den Hoogen, J.; Day, T. The  
528 adaptive evolution of virulence: a review of theoretical predictions and empirical  
529 tests. *Parasitology* **2016**, *143*, 915–930.
- 530 37. Gillum, A. M.; Tsay, E. Y.; Kirsch, D. R. Isolation of the *Candida albicans* gene for  
531 orotidine-5'-phosphate decarboxylase by complementation of *S. cerevisiae ura3* and  
532 *E. coli pyrF* mutations. *Mol Gen Genet* **1984**, *198*, 179–182.
- 533 38. Morschhäuser, J.; Ruhnke, M.; Michel, S.; Hacker, J. Identification of CARE-2-  
534 negative *Candida albicans* isolates as *Candida dubliniensis*. *Mycoses* **1999**, *42*, 29–  
535 32.
- 536 39. Jain, C.; Pastor, K.; Gonzalez, A. Y.; Lorenz, M. C.; Rao, R. P. The role of *Candida*  
537 *albicans* AP-1 protein against host derived ROS in in vivo models of infection.  
538 *Virulence* **2013**, *4*, 67–76.
- 539 40. Yapar, N. Epidemiology and risk factors for invasive candidiasis. *The Clin Risk*  
540 *Manag* **2014**, *10*, 95–105.
- 541 41. Krcméry, V.; Barnes, A. J. Non-*albicans* *Candida* spp. causing fungaemia:  
542 pathogenicity and antifungal resistance. *J. Hosp. Infect.* **2002**, *50*, 243–260.
- 543 42. Meisel, J. D.; Kim, D. H. Behavioral avoidance of pathogenic bacteria by  
544 *Caenorhabditis elegans*. *Trends Immunol.* **2014**, *35*, 465–470.
- 545 43. Jain, C.; Yun, M.; Politz, S. M.; Rao, R. P. A pathogenesis assay using  
546 *Saccharomyces cerevisiae* and *Caenorhabditis elegans* reveals novel roles for yeast  
547 AP-1, Yap1, and host dual oxidase BLI-3 in fungal pathogenesis. *Eukaryotic Cell*  
548 **2009**, *8*, 1218–1227.
- 549 44. Gravato-Nobre, M. J.; Nicholas, H. R.; Nijland, R.; O'Rourke, D.; Whittington, D. E.;  
550 Yook, K. J.; Hodgkin, J. Multiple genes affect sensitivity of *Caenorhabditis elegans* to  
551 the bacterial pathogen *Microbacterium nematophilum*. *Genetics* **2005**, *171*, 1033–  
552 1045.

- 553 45. Garsin, D. A.; Villanueva, J. M.; Begun, J.; Kim, D. H.; Sifri, C. D.; Calderwood, S.  
554 B.; Ruvkun, G.; Ausubel, F. M. Long-lived *C. elegans* *daf-2* mutants are resistant to  
555 bacterial pathogens. *Science* **2003**, *300*, 1921–1921.
- 556 46. Pfaller, M. A.; Diekema, D. J.; Gibbs, D. L.; Newell, V. A.; Ellis, D.; Tullio, V.;  
557 Rodloff, A.; Fu, W.; Ling, T. A.; Global Antifungal Surveillance Group Results from  
558 the ARTEMIS DISK Global Antifungal Surveillance Study, 1997 to 2007: a 10.5-year  
559 analysis of susceptibilities of *Candida* Species to fluconazole and voriconazole as  
560 determined by CLSI standardized disk diffusion. *J. Clin. Microbiol.* **2010**, *48*, 1366–  
561 1377.
- 562 47. Vilela, M. M. S.; Kamei, K.; Sano, A.; Tanaka, R.; Uno, J.; Takahashi, I.; Ito, J.;  
563 Yarita, K.; Miyaji, M. Pathogenicity and virulence of *Candida dubliniensis*:  
564 comparison with *C. albicans*. *Med Mycol* **2002**, *40*, 249–257.
- 565 48. Silva, S.; Negri, M.; Henriques, M.; Oliveira, R.; Williams, D. W.; Azeredo, J.  
566 *Candida glabrata*, *Candida parapsilosis* and *Candida tropicalis*: biology,  
567 epidemiology, pathogenicity and antifungal resistance. *FEMS Microbiol. Rev.* **2012**,  
568 *36*, 288–305.  
569
